# Supplementary material
Source: PubMed Central journal article supplement (PMC3098909)

**A**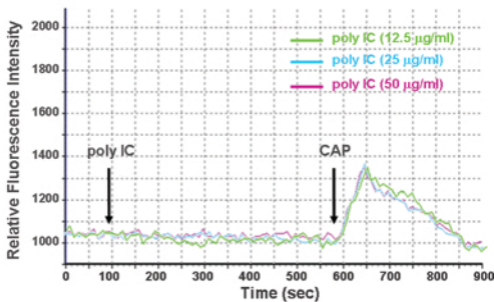**B**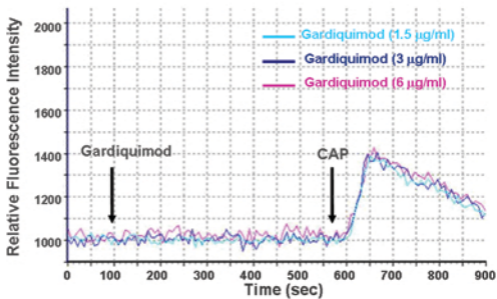**C**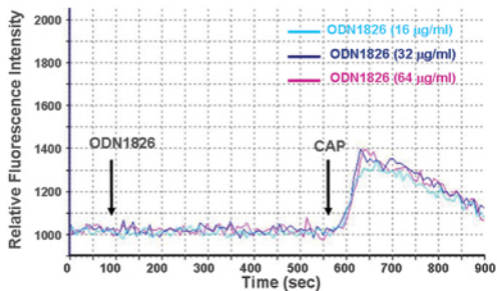

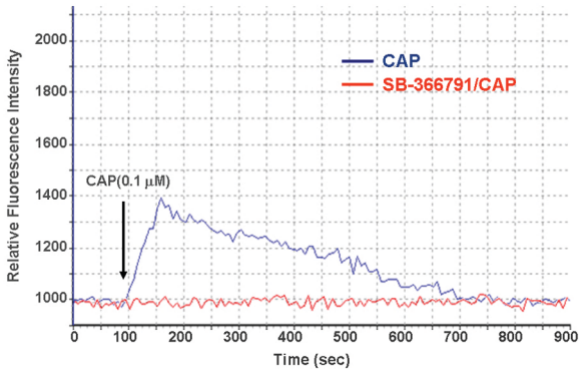

Supplement: NIHMS283972-supplement-supplement_1.pdf [file NIHMS283972-supplement-supplement_1.pdf]
